# Supplementary material
Source: PubMed Central journal article supplement (PMC1323194)

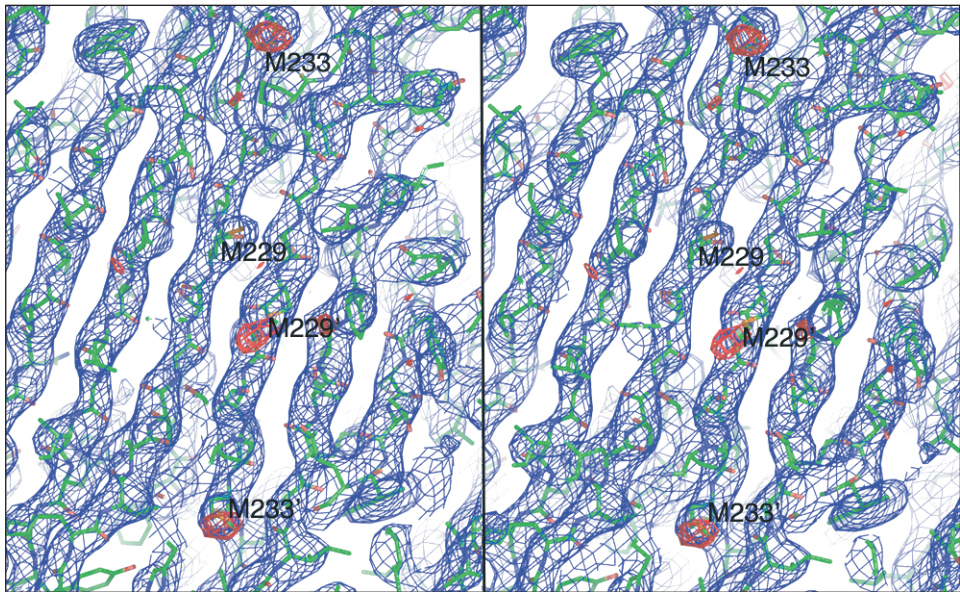

Supplement: pnas_0509487102_1.pdf [file pnas_0509487102_1.pdf]
